# Supplementary material for: How Assad changed population growth in Sweden and Norway: Syrian refugees’ impact on Nordic national and municipal demography
Source: PLoS One. 2021 Jan 20;16(1):e0244670. doi: 10.1371/journal.pone.0244670 (PMC7816981; doi:10.1371/journal.pone.0244670)
Supplement: S2 Data — (XLSX) [file pone.0244670.s004.xlsx]

## Sheet: Ark1
Input data used to estimate demographic development without war in Syria, on the municipal level
SWEDEN					NORWAY
Number of Syrians, NB by January 1st. Cells with 1-9 observations are marked as <10.					Number of Syrian immigrants by January 1st (according to the municipality structure at the time). Retrieved from https://www.ssb.no/statbank/table/09817/
	2016	2017	2018			2016	2017	2018
0114 Upplands Väsby	374	512	657		0104 Moss	53	103	131
0115 Vallentuna	49	99	157		0105 Sarpsborg	142	255	298
0117 Österåker	132	185	277		0106 Fredrikstad	172	312	378
0120 Värmdö	63	124	190		0111 Hvaler	8	9	23
0123 Järfälla	1357	1605	1753		0118 Aremark	7	7	9
0125 Ekerö	36	69	136		0119 Marker	5	11	12
0126 Huddinge	553	854	1061		0121 Rømskog	0	13	16
0127 Botkyrka	2060	2339	2510		0122 Trøgstad	3	8	14
0128 Salem	304	340	358		0123 Spydeberg	22	44	60
0136 Haninge	315	534	756		0124 Askim	53	87	91
0138 Tyresö	95	137	233		0125 Eidsberg	17	29	33
0139 Upplands-Bro	159	246	281		0127 Skiptvet	8	32	33
0140 Nykvarn	20	45	71		0128 Rakkestad	20	24	39
0160 Täby	152	335	353		0135 Råde	16	30	35
0162 Danderyd	70	137	186		0136 Rygge	5	27	51
0163 Sollentuna	593	822	1043		0137 Våler (Østfold)	18	29	30
0180 Stockholm	5025	6536	8094		0138 Hobøl	6	22	7
0181 Södertälje	6090	6758	7105		0211 Vestby	17	31	53
0182 Nacka	192	375	651		0213 Ski	66	97	120
0183 Sundbyberg	733	893	992		0214 Ås	34	39	57
0184 Solna	290	445	573		0215 Frogn	4	24	40
0186 Lidingö	100	217	302		0216 Nesodden	23	56	79
0187 Vaxholm	<10	23	38		0217 Oppegård	28	52	78
0188 Norrtälje	118	227	310		0219 Bærum	78	184	300
0191 Sigtuna	535	699	797		0220 Asker	59	133	165
0192 Nynäshamn	33	74	171		0221 Aurskog-Høland	10	33	52
0305 Håbo	54	109	137		0226 Sørum	11	25	34
0319 Älvkarleby	175	271	266		0227 Fet	10	25	29
0330 Knivsta	14	60	100		0228 Rælingen	16	42	61
0331 Heby	54	110	123		0229 Enebakk	6	23	35
0360 Tierp	111	217	269		0230 Lørenskog	24	71	94
0380 Uppsala	1637	2418	3268		0231 Skedsmo	184	293	355
0381 Enköping	371	612	730		0233 Nittedal	32	76	117
0382 Östhammar	34	85	116		0234 Gjerdrum	4	17	21
0428 Vingåker	127	190	203		0235 Ullensaker	36	77	107
0461 Gnesta	25	118	108		0236 Nes (Akershus)	0	8	20
0480 Nyköping	426	666	797		0237 Eidsvoll	10	29	50
0481 Oxelösund	280	430	428		0238 Nannestad	33	47	61
0482 Flen	533	862	854		0239 Hurdal	0	18	6
0483 Katrineholm	409	641	846		0301 Oslo kommune	897	1481	2212
0484 Eskilstuna	2172	3048	3463		0402 Kongsvinger	41	70	78
0486 Strängnäs	260	392	415		0403 Hamar	48	87	139
0488 Trosa	51	90	112		0412 Ringsaker	25	72	115
0509 Ödeshög	48	111	149		0415 Løten	13	25	36
0512 Ydre	16	22	33		0417 Stange	32	42	78
0513 Kinda	39	71	116		0418 Nord-Odal	11	15	19
0560 Boxholm	37	46	60		0419 Sør-Odal	3	11	36
0561 Åtvidaberg	120	182	176		0420 Eidskog	8	26	31
0562 Finspång	326	512	424		0423 Grue	3	15	27
0563 Valdemarsvik	179	297	331		0425 Åsnes	16	25	20
0580 Linköping	1253	1739	2207		0426 Våler (Hedmark)	0	5	5
0581 Norrköping	3835	4969	5597		0427 Elverum	28	51	88
0582 Söderköping	21	53	86		0428 Trysil	17	21	25
0583 Motala	789	1022	1166		0429 Åmot	3	13	13
0584 Vadstena	40	65	95		0430 Stor-Elvdal	12	18	23
0586 Mjölby	183	249	356		0432 Rendalen	0	14	18
0604 Aneby	80	113	145		0434 Engerdal	8	8	11
0617 Gnosjö	105	174	217		0436 Tolga	12	18	19
0642 Mullsjö	17	44	53		0437 Tynset	19	26	31
0643 Habo	28	70	112		0438 Alvdal	6	17	16
0662 Gislaved	614	1024	1150		0439 Folldal	0	0	3
0665 Vaggeryd	59	166	182		0501 Lillehammer	41	72	106
0680 Jönköping	1952	2551	2992		0502 Gjøvik	73	170	179
0682 Nässjö	674	956	1042		0511 Dovre	11	30	24
0683 Värnamo	161	396	521		0512 Lesja	0	3	5
0684 Sävsjö	445	520	583		0514 Lom	0	8	15
0685 Vetlanda	455	686	776		0515 Vågå	8	8	12
0686 Eksjö	248	518	676		0516 Nord-Fron	13	38	62
0687 Tranås	244	394	512		0517 Sel	22	34	42
0760 Uppvidinge	251	352	378		0519 Sør-Fron	3	16	17
0761 Lessebo	586	725	803		0520 Ringebu	15	28	31
0763 Tingsryd	179	292	321		0521 Øyer	4	12	28
0764 Alvesta	249	409	373		0522 Gausdal	4	7	19
0765 Älmhult	133	344	532		0528 Østre Toten	28	61	82
0767 Markaryd	257	484	632		0529 Vestre Toten	11	34	59
0780 Växjö	583	926	1148		0532 Jevnaker	17	20	37
0781 Ljungby	172	371	532		0533 Lunner	8	26	51
0821 Högsby	288	514	539		0534 Gran	12	32	72
0834 Torsås	94	210	175		0536 Søndre Land	8	17	22
0840 Mörbylånga	60	253	220		0538 Nordre Land	10	22	35
0860 Hultsfred	593	1212	1092		0540 Sør-Aurdal	7	19	19
0861 Mönsterås	348	584	636		0541 Etnedal	11	25	29
0862 Emmaboda	112	311	384		0542 Nord-Aurdal	22	34	37
0880 Kalmar	590	924	1160		0543 Vestre Slidre	0	11	28
0881 Nybro	576	1145	1116		0544 Øystre Slidre	20	39	45
0882 Oskarshamn	280	725	572		0545 Vang	9	25	16
0883 Västervik	447	811	851		0602 Drammen	141	270	379
0884 Vimmerby	240	463	576		0604 Kongsberg	68	89	112
0885 Borgholm	138	374	275		0605 Ringerike	64	122	174
0980 Gotland	125	352	439		0612 Hole	21	27	26
1060 Olofström	384	637	666		0615 Flå	18	28	34
1080 Karlskrona	732	1096	1142		0616 Nes (Buskerud)	18	10	16
1081 Ronneby	1170	1734	2031		0617 Gol	21	46	40
1082 Karlshamn	522	779	898		0618 Hemsedal	15	21	11
1083 Sölvesborg	173	299	313		0619 Ål	4	13	11
1214 Svalöv	155	259	253		0620 Hol	0	8	15
1230 Staffanstorp	12	52	146		0621 Sigdal	29	50	56
1231 Burlöv	102	187	249		0622 Krødsherad	13	25	27
1233 Vellinge	21	61	145		0623 Modum	17	52	88
1256 Östra Göinge	618	945	1070		0624 Øvre Eiker	5	24	55
1257 Örkelljunga	128	261	257		0625 Nedre Eiker	28	46	92
1260 Bjuv	164	285	444		0626 Lier	34	55	86
1261 Kävlinge	70	146	194		0627 Røyken	45	68	100
1262 Lomma	13	64	126		0628 Hurum	23	37	55
1263 Svedala	65	140	202		0631 Flesberg	4	7	22
1264 Skurup	83	187	287		0632 Rollag	4	4	12
1265 Sjöbo	43	91	108		0633 Nore og Uvdal	5	5	14
1266 Hörby	49	97	152		0701 Horten	28	104	127
1267 Höör	10	54	96		0702 Holmestrand (-2017)	8	30	0
1270 Tomelilla	106	207	267		0704 Tønsberg	110	200	257
1272 Bromölla	201	290	377		0706 Sandefjord (-2016)	98	0	0
1273 Osby	216	395	454		0709 Larvik (-2017)	216	283	0
1275 Perstorp	201	371	378		0710 Sandefjord	0	255	328
1276 Klippan	82	199	317		0711 Svelvik	6	23	32
1277 Åstorp	302	498	650		0712 Larvik	0	0	327
1278 Båstad	105	222	279		0713 Sande (Vestfold)	7	26	34
1280 Malmö	3325	5109	6440		0714 Hof (-2017)	0	4	0
1281 Lund	252	520	902		0715 Holmestrand	0	0	51
1282 Landskrona	733	963	1107		0716 Re	10	26	41
1283 Helsingborg	2008	2898	3629		0719 Andebu (-2016)	3	0	0
1284 Höganäs	104	274	276		0720 Stokke (-2016)	38	0	0
1285 Eslöv	152	278	434		0722 Nøtterøy (-2017)	36	79	0
1286 Ystad	142	388	343		0723 Tjøme (-2017)	17	43	0
1287 Trelleborg	293	437	621		0728 Lardal (-2017)	3	7	0
1290 Kristianstad	1217	1629	2039		0729 Færder	0	0	151
1291 Simrishamn	335	642	541		0805 Porsgrunn	60	177	190
1292 Ängelholm	182	316	376		0806 Skien	115	191	253
1293 Hässleholm	700	1167	1308		0807 Notodden	34	65	90
1315 Hylte	568	879	942		0811 Siljan	21	39	45
1380 Halmstad	1272	2058	2337		0814 Bamble	10	27	48
1381 Laholm	504	721	861		0815 Kragerø	42	60	95
1382 Falkenberg	536	1081	997		0817 Drangedal	23	40	54
1383 Varberg	241	504	625		0819 Nome	22	61	71
1384 Kungsbacka	163	316	588		0821 Bø (Telemark)	11	21	29
1401 Härryda	48	169	233		0822 Sauherad	43	58	78
1402 Partille	112	193	291		0826 Tinn	7	31	41
1407 Öckerö	<10	39	59		0827 Hjartdal	0	0	8
1415 Stenungsund	79	161	223		0828 Seljord	12	17	37
1419 Tjörn	72	100	114		0829 Kviteseid	0	9	10
1421 Orust	56	103	116		0830 Nissedal	0	17	22
1427 Sotenäs	30	94	95		0831 Fyresdal	10	22	30
1430 Munkedal	138	288	315		0833 Tokke	4	19	32
1435 Tanum	91	163	226		0834 Vinje	4	23	27
1438 Dals-Ed	56	70	73		0901 Risør	42	89	90
1439 Färgelanda	79	141	151		0904 Grimstad	44	84	134
1440 Ale	151	243	324		0906 Arendal	130	238	279
1441 Lerum	60	133	272		0911 Gjerstad	11	21	38
1442 Vårgårda	53	125	170		0912 Vegårshei	8	27	33
1443 Bollebygd	<10	43	66		0914 Tvedestrand	9	36	48
1444 Grästorp	27	46	50		0919 Froland	0	12	46
1445 Essunga	39	48	66		0926 Lillesand	41	56	74
1446 Karlsborg	72	188	201		0928 Birkenes	12	20	27
1447 Gullspång	48	133	114		0929 Åmli	8	20	28
1452 Tranemo	109	203	192		0935 Iveland	14	21	24
1460 Bengtsfors	217	490	549		0937 Evje og Hornnes	3	26	22
1461 Mellerud	313	490	490		0938 Bygland	18	27	35
1462 Lilla Edet	96	140	190		0940 Valle	21	24	35
1463 Mark	138	302	397		0941 Bykle	3	14	14
1465 Svenljunga	193	294	241		1001 Kristiansand	294	552	644
1466 Herrljunga	55	93	89		1002 Mandal	43	93	138
1470 Vara	80	144	182		1003 Farsund	43	84	111
1471 Götene	101	249	228		1004 Flekkefjord	38	82	118
1472 Tibro	507	646	681		1014 Vennesla	31	72	91
1473 Töreboda	300	459	482		1017 Songdalen	42	82	84
1480 Göteborg	4193	5701	6931		1018 Søgne	24	46	68
1481 Mölndal	159	318	487		1021 Marnardal	3	9	7
1482 Kungälv	120	213	346		1027 Audnedal	4	16	17
1484 Lysekil	205	360	416		1029 Lindesnes	20	39	63
1485 Uddevalla	868	1432	1646		1032 Lyngdal	46	94	100
1486 Strömstad	33	146	130		1034 Hægebostad	0	13	18
1487 Vänersborg	713	1081	1046		1037 Kvinesdal	21	47	53
1488 Trollhättan	912	1252	1372		1046 Sirdal	4	13	18
1489 Alingsås	219	358	421		1101 Eigersund	49	72	91
1490 Borås	923	1616	1956		1102 Sandnes	124	191	295
1491 Ulricehamn	216	369	436		1103 Stavanger	181	488	612
1492 Åmål	502	709	743		1106 Haugesund	97	187	215
1493 Mariestad	210	282	336		1111 Sokndal	0	12	17
1494 Lidköping	261	401	506		1112 Lund	23	50	31
1495 Skara	320	554	515		1114 Bjerkreim	3	13	15
1496 Skövde	1136	1389	1582		1119 Hå	22	76	85
1497 Hjo	99	123	120		1120 Klepp	33	65	97
1498 Tidaholm	244	328	343		1121 Time	22	73	85
1499 Falköping	394	565	686		1122 Gjesdal	5	74	82
1715 Kil	23	40	62		1124 Sola	16	58	87
1730 Eda	57	86	114		1127 Randaberg	31	66	89
1737 Torsby	117	376	207		1129 Forsand	8	17	23
1760 Storfors	84	130	112		1130 Strand	33	110	116
1761 Hammarö	13	33	62		1133 Hjelmeland	6	18	38
1762 Munkfors	62	149	147		1134 Suldal	13	14	29
1763 Forshaga	72	127	147		1135 Sauda	3	52	40
1764 Grums	92	163	138		1141 Finnøy	8	29	37
1765 Årjäng	90	175	189		1142 Rennesøy	9	25	34
1766 Sunne	244	457	337		1146 Tysvær	48	74	97
1780 Karlstad	437	737	1020		1149 Karmøy	25	68	108
1781 Kristinehamn	568	891	873		1160 Vindafjord	10	29	30
1782 Filipstad	202	487	404		1201 Bergen	334	768	1184
1783 Hagfors	163	280	259		1211 Etne	6	25	30
1784 Arvika	129	267	292		1216 Sveio	18	26	40
1785 Säffle	212	464	519		1219 Bømlo	28	75	103
1814 Lekeberg	27	58	85		1221 Stord	36	90	83
1860 Laxå	145	229	203		1222 Fitjar	13	25	27
1861 Hallsberg	165	285	426		1224 Kvinnherad	0	39	58
1862 Degerfors	90	170	212		1227 Jondal	3	11	17
1863 Hällefors	164	317	339		1228 Odda	7	98	53
1864 Ljusnarsberg	225	325	290		1231 Ullensvang	14	41	44
1880 Örebro	1702	2180	2833		1233 Ulvik	17	22	27
1881 Kumla	125	192	239		1235 Voss	31	86	96
1882 Askersund	173	301	247		1238 Kvam	11	29	42
1883 Karlskoga	410	623	650		1241 Fusa	14	31	48
1884 Nora	173	324	353		1242 Samnanger	0	15	19
1885 Lindesberg	499	677	583		1243 Os (Hordaland)	24	54	89
1904 Skinnskatteberg	62	55	42		1244 Austevoll	0	8	17
1907 Surahammar	65	108	109		1245 Sund	9	29	15
1960 Kungsör	204	299	430		1246 Fjell	74	120	148
1961 Hallstahammar	127	186	221		1247 Askøy	21	57	95
1962 Norberg	120	180	110		1251 Vaksdal	30	57	82
1980 Västerås	1908	2859	3464		1252 Modalen	3	8	12
1981 Sala	196	318	459		1253 Osterøy	0	9	13
1982 Fagersta	603	802	825		1256 Meland	12	38	57
1983 Köping	351	517	624		1259 Øygarden	0	26	17
1984 Arboga	308	352	349		1260 Radøy	0	25	11
2021 Vansbro	42	179	130		1263 Lindås	6	40	51
2023 Malung-Sälen	30	117	117		1264 Austrheim	8	27	37
2026 Gagnef	21	31	36		1265 Fedje	8	20	19
2029 Leksand	62	178	159		1266 Masfjorden	12	24	34
2031 Rättvik	11	86	34		1401 Flora	42	83	94
2034 Orsa	18	99	131		1411 Gulen	10	29	30
2039 Älvdalen	13	31	32		1412 Solund	5	15	24
2061 Smedjebacken	42	133	111		1413 Hyllestad	5	17	13
2062 Mora	69	119	155		1416 Høyanger	20	73	52
2080 Falun	264	462	643		1417 Vik	8	18	30
2081 Borlänge	621	870	1048		1418 Balestrand	13	35	40
2082 Säter	23	44	56		1419 Leikanger	16	30	34
2083 Hedemora	289	504	475		1420 Sogndal	24	67	73
2084 Avesta	801	1161	1138		1421 Aurland	0	10	12
2085 Ludvika	262	591	555		1422 Lærdal	3	25	30
2101 Ockelbo	13	23	43		1424 Årdal	20	38	33
2104 Hofors	39	110	107		1426 Luster	0	20	34
2121 Ovanåker	148	249	232		1428 Askvoll	4	39	47
2132 Nordanstig	30	71	55		1430 Gaular	5	25	36
2161 Ljusdal	151	224	212		1431 Jølster	27	54	26
2180 Gävle	1380	1785	1980		1432 Førde	30	109	89
2181 Sandviken	851	1225	1421		1433 Naustdal	6	18	26
2182 Söderhamn	443	746	683		1438 Bremanger	0	26	26
2183 Bollnäs	467	653	716		1439 Vågsøy	11	48	64
2184 Hudiksvall	137	251	265		1441 Selje	6	16	23
2260 Ånge	22	107	100		1443 Eid	20	43	57
2262 Timrå	53	104	100		1445 Gloppen	4	23	38
2280 Härnösand	508	712	732		1449 Stryn	22	66	67
2281 Sundsvall	385	584	639		1502 Molde	39	101	151
2282 Kramfors	167	334	303		1504 Ålesund	86	197	204
2283 Sollefteå	194	386	403		1505 Kristiansund	34	89	116
2284 Örnsköldsvik	402	653	790		1511 Vanylven	0	0	4
2303 Ragunda	27	76	96		1514 Sande (Møre og Romsdal)	0	3	5
2305 Bräcke	47	107	101		1515 Herøy (Møre og Romsdal)	26	35	41
2309 Krokom	76	116	89		1516 Ulstein	32	67	55
2313 Strömsund	69	216	210		1517 Hareid	16	25	35
2321 Åre	56	182	148		1519 Volda	19	40	43
2326 Berg	56	139	132		1520 Ørsta	14	32	42
2361 Härjedalen	77	109	125		1523 Ørskog	0	0	6
2380 Östersund	407	497	569		1525 Stranda	0	16	22
2401 Nordmaling	15	23	26		1528 Sykkylven	5	11	25
2403 Bjurholm	17	22	27		1529 Skodje	0	8	17
2404 Vindeln	19	44	29		1531 Sula	11	18	40
2409 Robertsfors	13	24	31		1532 Giske	3	13	27
2417 Norsjö	12	25	23		1534 Haram	31	41	56
2418 Malå	<10	10	17		1535 Vestnes	5	13	13
2421 Storuman	<10	12	35		1539 Rauma	0	11	17
2422 Sorsele	<10	<10	<10		1543 Nesset	4	11	22
2425 Dorotea	<10	19	<10		1545 Midsund	0	18	19
2460 Vännäs	12	26	31		1546 Sandøy	0	6	20
2462 Vilhelmina	36	69	69		1547 Aukra	21	29	37
2463 Åsele	<10	55	20		1548 Fræna	3	22	41
2480 Umeå	124	289	569		1551 Eide	0	7	7
2481 Lycksele	36	82	122		1554 Averøy	9	13	26
2482 Skellefteå	174	310	292		1557 Gjemnes	0	5	11
2505 Arvidsjaur	40	42	50		1560 Tingvoll	9	38	37
2506 Arjeplog	0	<10	<10		1563 Sunndal	51	64	55
2510 Jokkmokk	38	114	69		1566 Surnadal	0	4	5
2513 Överkalix	16	25	26		1567 Rindal (-2018)	0	6	12
2514 Kalix	18	81	91		1571 Halsa	3	31	22
2518 Övertorneå	17	17	<10		1573 Smøla	9	27	29
2521 Pajala	24	79	46		1576 Aure	15	23	30
2523 Gällivare	35	47	48		1601 Trondheim (-2017)	336	625	0
2560 Älvsbyn	21	44	69		1612 Hemne (-2017)	14	34	0
2580 Luleå	77	164	335		1613 Snillfjord (-2017)	0	7	0
2581 Piteå	58	271	233		1617 Hitra (-2017)	3	19	0
2582 Boden	128	215	199		1620 Frøya (-2017)	0	8	0
2583 Haparanda	33	97	82		1621 Ørland (-2017)	12	16	0
2584 Kiruna	31	99	86		1622 Agdenes (-2017)	0	4	0
					1624 Rissa (-2017)	0	18	0
					1627 Bjugn (-2017)	7	14	0
					1630 Åfjord (-2017)	25	37	0
					1633 Osen (-2017)	0	8	0
					1634 Oppdal (-2017)	0	9	0
					1635 Rennebu (-2017)	5	19	0
					1636 Meldal (-2017)	11	19	0
					1638 Orkdal (-2017)	21	54	0
					1640 Røros (-2017)	6	20	0
					1644 Holtålen (-2017)	3	16	0
					1648 Midtre Gauldal (-2017)	6	15	0
					1653 Melhus (-2017)	31	56	0
					1657 Skaun (-2017)	9	30	0
					1662 Klæbu (-2017)	0	7	0
					1663 Malvik (-2017)	39	78	0
					1664 Selbu (-2017)	0	5	0
					1665 Tydal (-2017)	0	3	0
					1702 Steinkjer (-2017)	4	105	0
					1703 Namsos (-2017)	31	78	0
					1711 Meråker (-2017)	9	26	0
					1714 Stjørdal (-2017)	43	102	0
					1717 Frosta (-2017)	0	20	0
					1718 Leksvik (-2017)	0	3	0
					1719 Levanger (-2017)	46	87	0
					1721 Verdal (-2017)	26	62	0
					1724 Verran (-2017)	12	34	0
					1725 Namdalseid (-2017)	0	13	0
					1736 Snåase - Snåsa (-2017)	0	30	0
					1738 Lierne (-2017)	0	11	0
					1739 Raarvihke - Røyrvik (-2017)	0	10	0
					1740 Namsskogan (-2017)	5	33	0
					1742 Grong (-2017)	5	46	0
					1743 Høylandet (-2017)	0	3	0
					1744 Overhalla (-2017)	3	13	0
					1748 Fosnes (-2017)	0	7	0
					1749 Flatanger (-2017)	0	4	0
					1750 Vikna (-2017)	18	28	0
					1751 Nærøy (-2017)	48	81	0
					1756 Inderøy (-2017)	0	5	0
					1804 Bodø	78	192	223
					1805 Narvik	18	41	68
					1811 Bindal	0	7	22
					1812 Sømna	4	12	28
					1813 Brønnøy	26	53	76
					1815 Vega	0	7	6
					1816 Vevelstad	6	22	23
					1818 Herøy (Nordland)	16	47	53
					1820 Alstahaug	22	52	51
					1822 Leirfjord	20	49	56
					1824 Vefsn	24	44	71
					1825 Grane	0	11	11
					1826 Hattfjelldal	17	4	17
					1827 Dønna	8	23	26
					1828 Nesna	15	36	40
					1832 Hemnes	4	16	21
					1833 Rana	18	71	107
					1837 Meløy	36	56	70
					1838 Gildeskål	9	13	13
					1839 Beiarn	15	23	21
					1840 Saltdal	25	59	39
					1841 Fauske - Fuosko	43	64	74
					1845 Sørfold	0	9	15
					1848 Steigen	3	7	23
					1851 Lødingen	17	24	34
					1853 Evenes	0	14	20
					1854 Ballangen	11	27	41
					1859 Flakstad	0	11	19
					1860 Vestvågøy	33	68	86
					1865 Vågan	70	102	123
					1866 Hadsel	12	33	63
					1867 Bø (Nordland)	4	16	31
					1868 Øksnes	10	24	25
					1870 Sortland - Suortá	13	39	71
					1871 Andøy	18	45	73
					1874 Moskenes	0	13	24
					1902 Tromsø	138	314	416
					1903 Harstad - Hárstták	82	167	190
					1911 Kvæfjord	29	39	37
					1913 Skånland	6	5	4
					1917 Ibestad	4	4	5
					1919 Gratangen	4	6	10
					1920 Loabák - Lavangen	19	21	7
					1922 Bardu	23	31	48
					1923 Salangen	8	6	30
					1924 Målselv	4	24	25
					1925 Sørreisa	26	44	55
					1926 Dyrøy	0	6	18
					1927 Tranøy	3	16	23
					1928 Torsken	20	29	33
					1929 Berg	12	17	37
					1931 Lenvik	34	68	69
					1933 Balsfjord	8	24	22
					1936 Karlsøy	0	7	12
					1938 Lyngen	0	8	16
					1939 Storfjord - Omasvuotna - Omasvuono	6	15	16
					1940 Gáivuotna - Kåfjord - Kaivuono	3	15	20
					1941 Skjervøy	9	19	37
					1942 Nordreisa - Ráisa - Raisi	21	49	57
					1943 Kvænangen	0	10	16
					2002 Vardø	0	6	13
					2003 Vadsø	48	99	108
					2004 Hammerfest	46	71	107
					2012 Alta	45	87	106
					2014 Loppa	0	15	16
					2015 Hasvik	3	7	7
					2017 Kvalsund	3	15	19
					2019 Nordkapp	4	21	28
					2020 Porsanger - Porsángu - Porsanki	7	20	31
					2021 Kárásjohka - Karasjok	0	8	11
					2022 Lebesby	0	18	24
					2023 Gamvik	0	5	11
					2024 Berlevåg	0	6	13
					2025 Deatnu - Tana	5	26	46
					2027 Unjárga - Nesseby	15	17	15
					2028 Båtsfjord	8	20	26
					2030 Sør-Varanger	43	111	140
					5001 Trondheim	0	0	964
					5004 Steinkjer	0	0	126
					5005 Namsos	0	0	99
					5011 Hemne	0	0	18
					5012 Snillfjord	0	0	7
					5013 Hitra	0	0	12
					5014 Frøya	0	0	9
					5015 Ørland	0	0	23
					5016 Agdenes	0	0	12
					5017 Bjugn	0	0	16
					5018 Åfjord	0	0	44
					5020 Osen	0	0	15
					5021 Oppdal	0	0	18
					5022 Rennebu	0	0	27
					5023 Meldal	0	0	29
					5024 Orkdal	0	0	70
					5025 Røros	0	0	26
					5026 Holtålen	0	0	19
					5027 Midtre Gauldal	0	0	23
					5028 Melhus	0	0	85
					5029 Skaun	0	0	45
					5030 Klæbu	0	0	37
					5031 Malvik	0	0	102
					5032 Selbu	0	0	5
					5034 Meråker	0	0	24
					5035 Stjørdal	0	0	124
					5036 Frosta	0	0	23
					5037 Levanger	0	0	99
					5038 Verdal	0	0	96
					5039 Verran	0	0	54
					5040 Namdalseid	0	0	18
					5041 Snåase - Snåsa	0	0	18
					5042 Lierne	0	0	21
					5043 Raarvihke - Røyrvik	0	0	15
					5044 Namsskogan	0	0	49
					5045 Grong	0	0	27
					5046 Høylandet	0	0	8
					5047 Overhalla	0	0	11
					5048 Fosnes	0	0	12
					5049 Flatanger	0	0	10
					5050 Vikna	0	0	52
					5051 Nærøy	0	0	91
					5053 Inderøy	0	0	19
					5054 Indre Fosen	0	0	39
